# Supplementary material
Source: PubMed Central journal article supplement (PMC8189744)

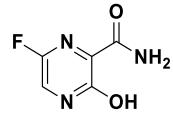

Favipiravir

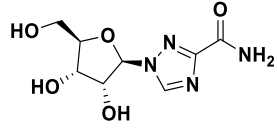

Ribavirin

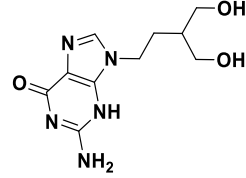

Penciclovir

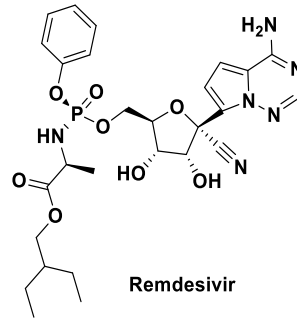

Remdesivir

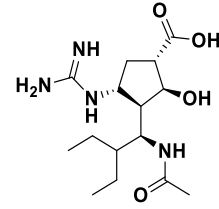

Peramivir

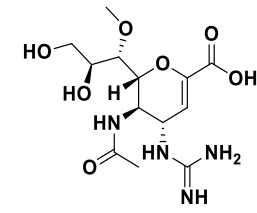

Laninamivir

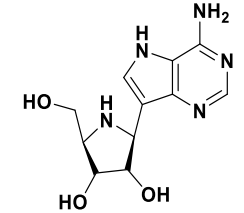

Galidesivir

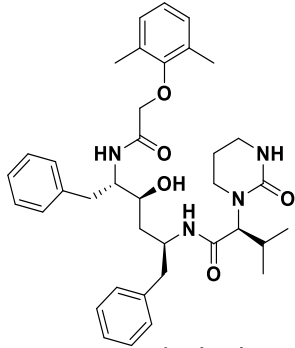

Lopinavir

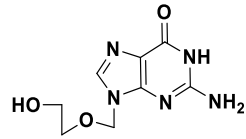

Aciclovir

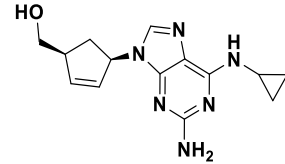

Abacavir

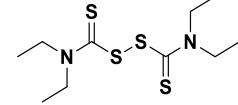

Disulfiram

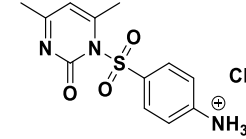

Compound 6

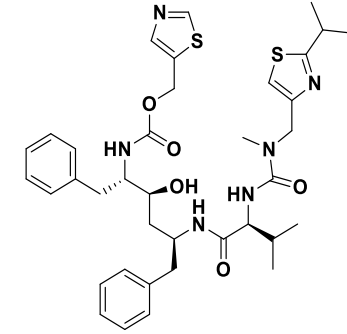

Ritonavir

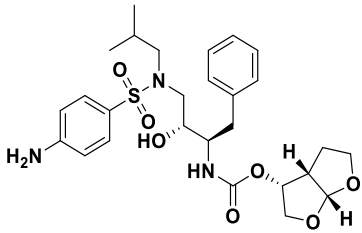

Darunavir

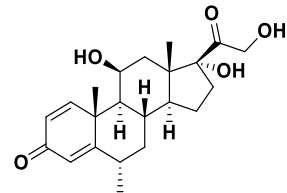

Methylprednisolone

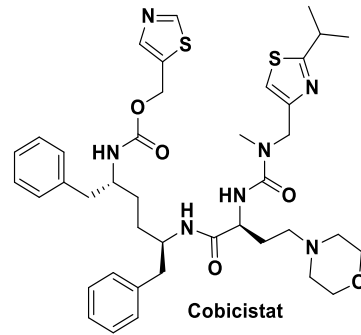

Cobicistat

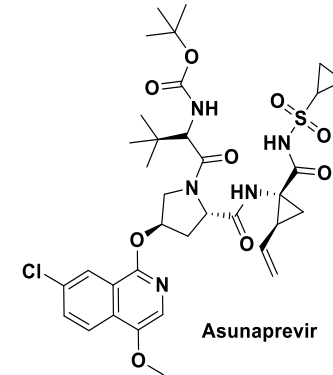

Asunaprevir

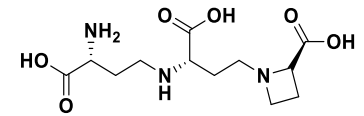

Nicotianamine

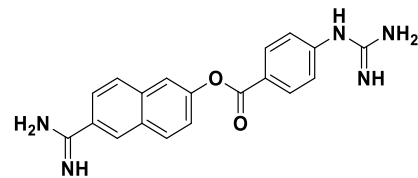

Nafamostat

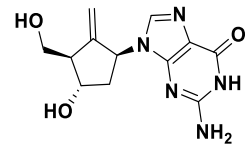

Entecavir

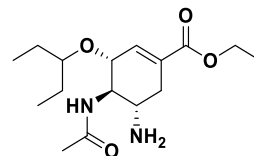

Osetamivir

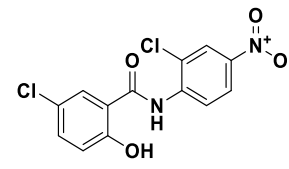

Niclosamide

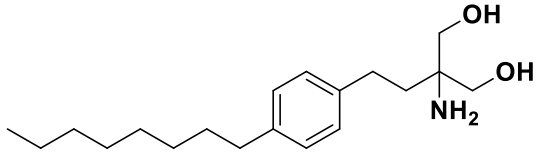

Fingolimod

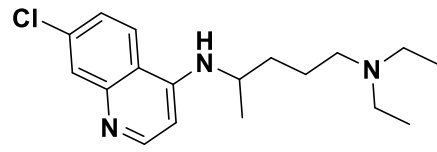

Chloroquine

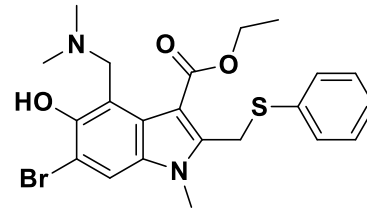

Arbidol

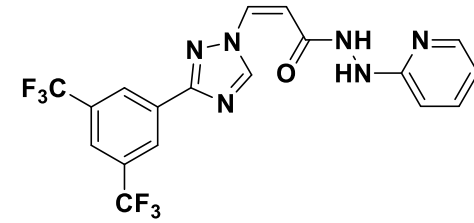

Verdinexor

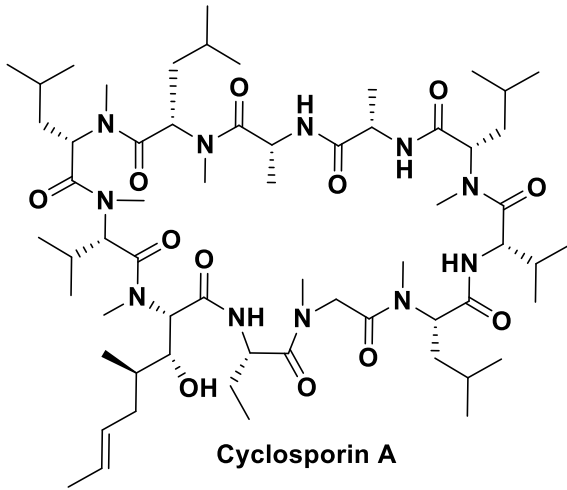

Cyclosporin A

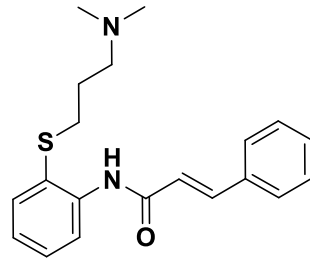

Cinanserin

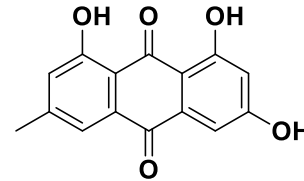

Emodin

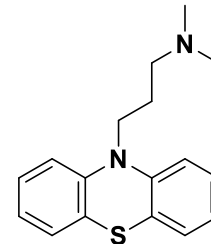

Promazine

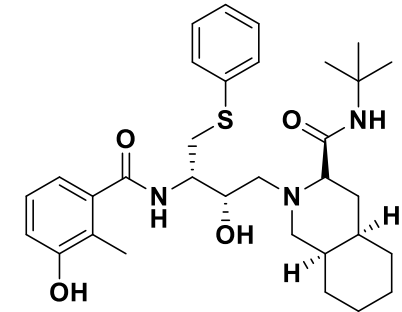

Nelfinavir

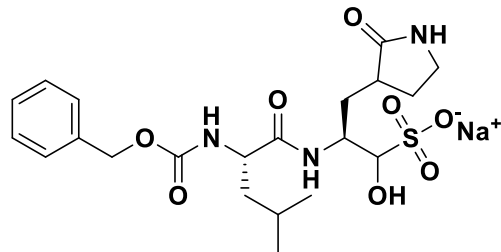

GC376

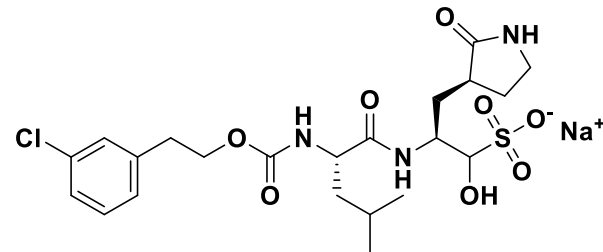

GC813

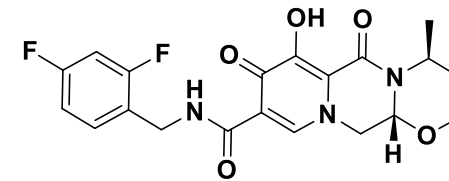

Dolutegravir

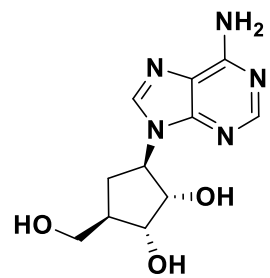

Aristeromycin

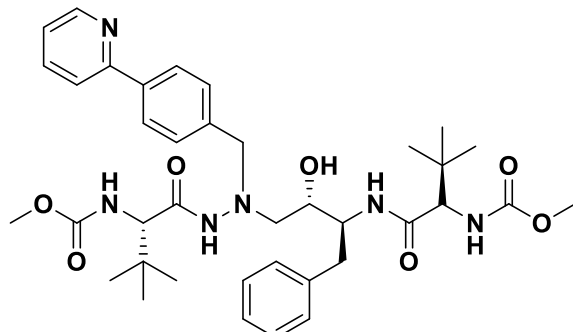

Atazanavir

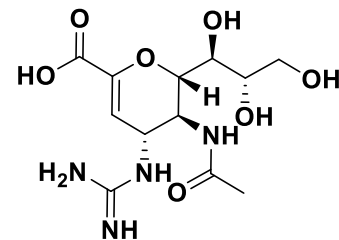

Zanamivir

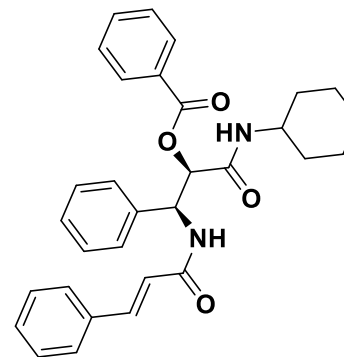

SK80

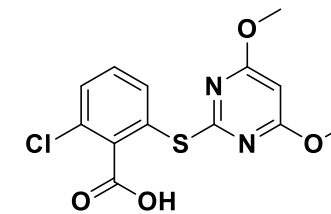

Pyriithobac

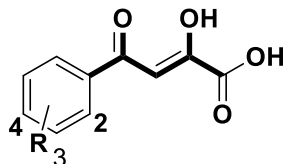

Aryl diketoacids

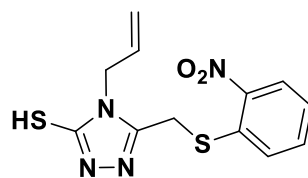

SSYA10-001

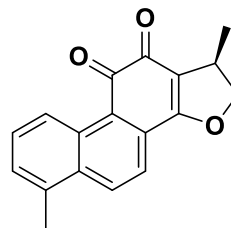

Dihydropantoin

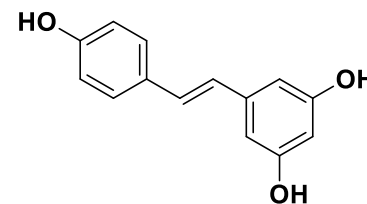

Resveratrol

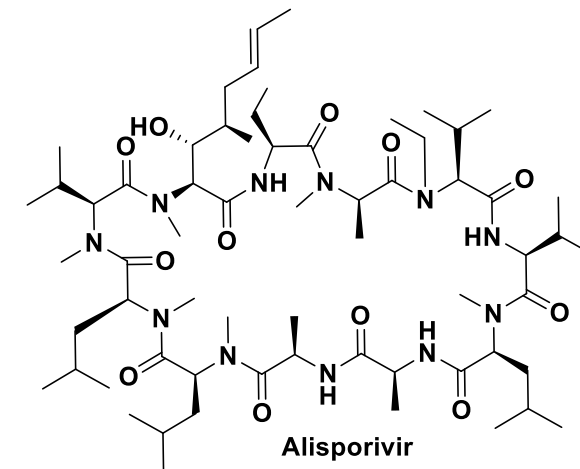

Alisporivir

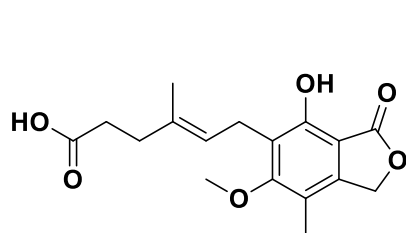

Mycophenolic acid

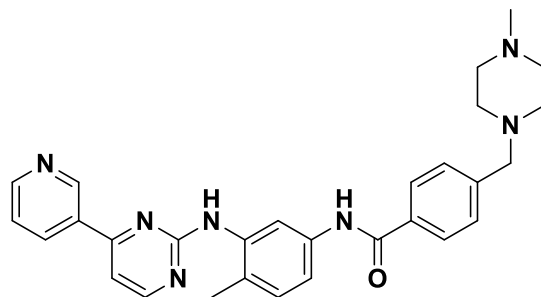

Imatinib

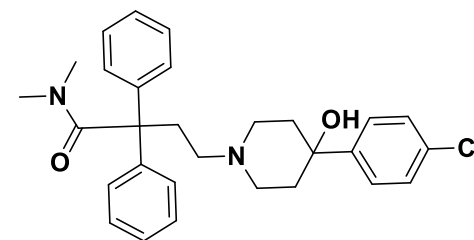

Loperamide

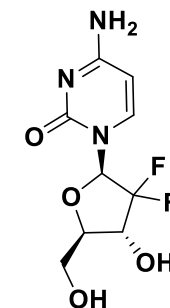

Gemcitabine

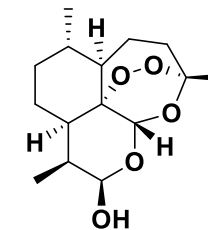

Dihydroartemisinin

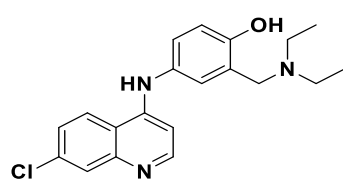

**Amodiaquine**

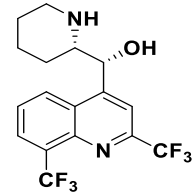

**Mefloquine**

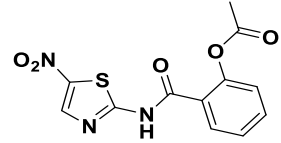

**Nitazoxanide**

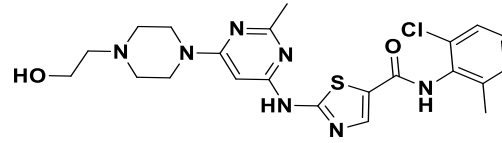

**Dasatinib**

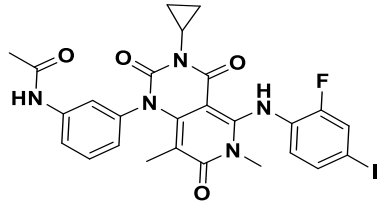

**Trametinib**

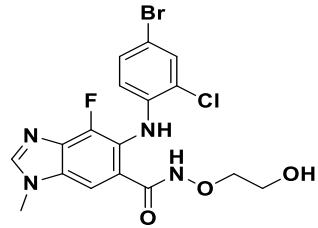

**Selumetinib**

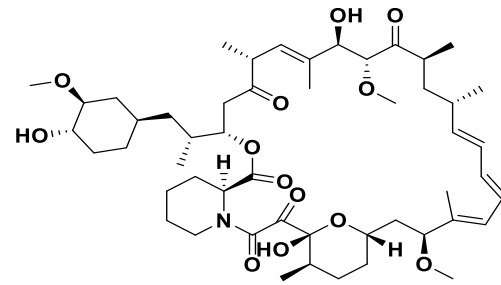

**Rapamycin**

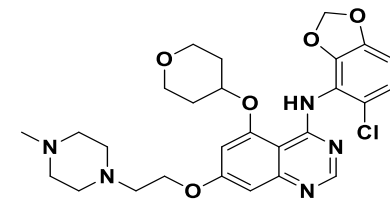

**Saracatinib**

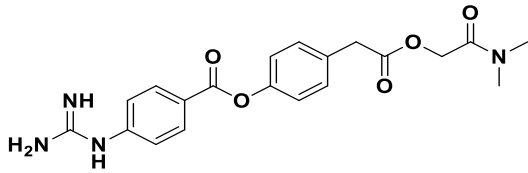

**Camostat**

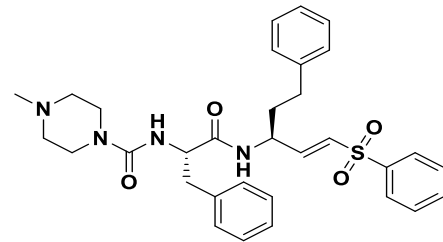

**K11777**

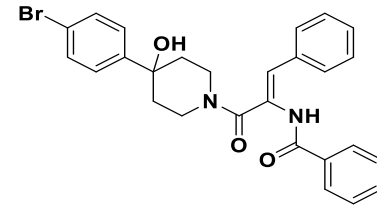

**K22**

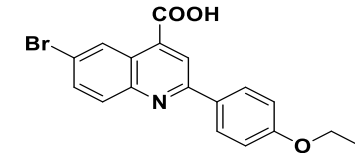

**FA-613**

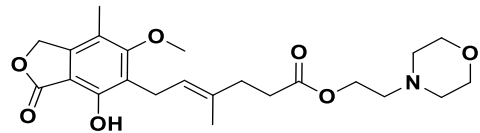

**Mycophenolate Mofetil**

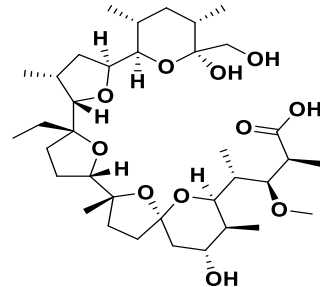

**Monensin**

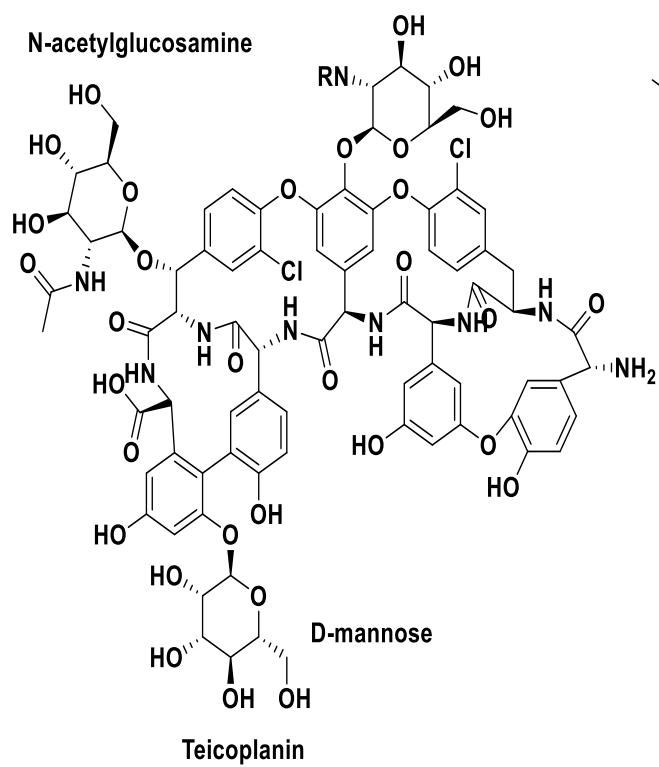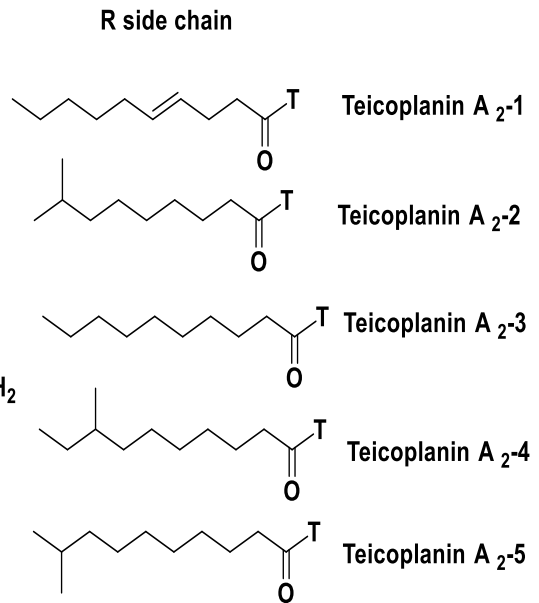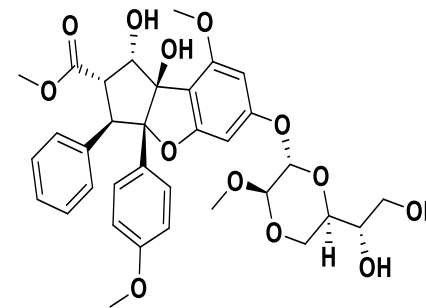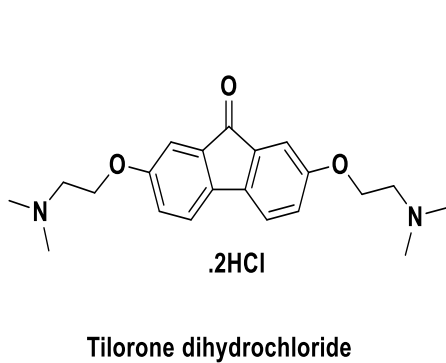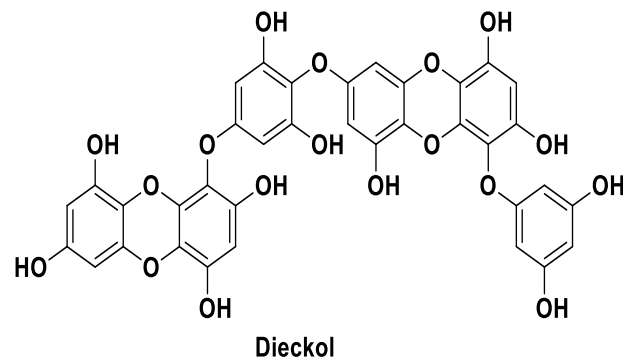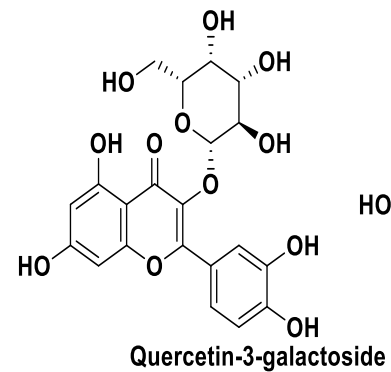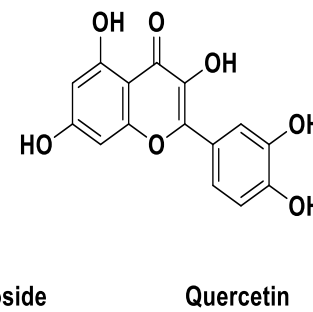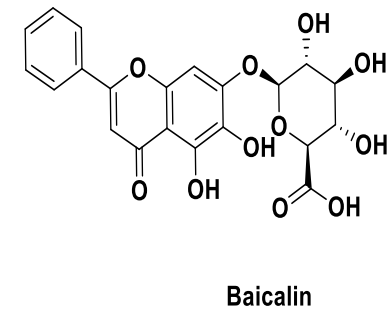

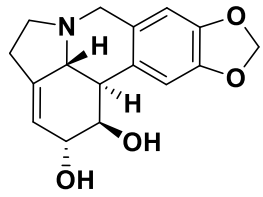

Lycorine

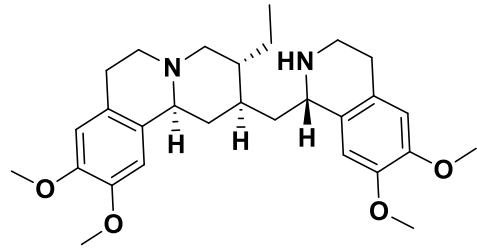

Emetine

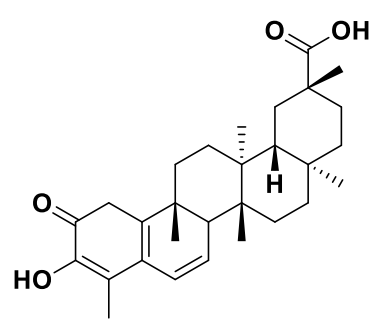

Celastrol

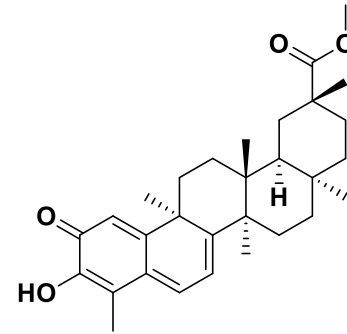

Pristimerin

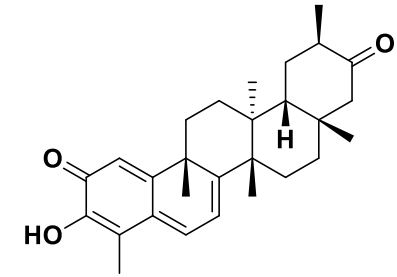

Tingenone

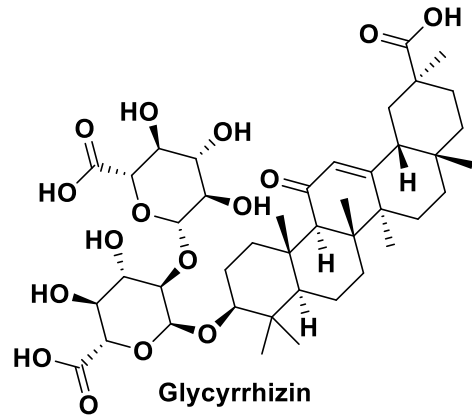

Glycyrrhizin

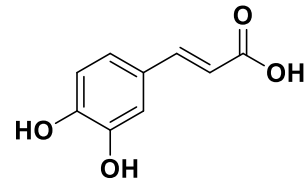

Caffeic acid

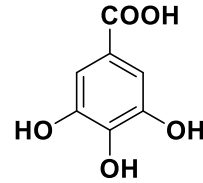

Gallic acid

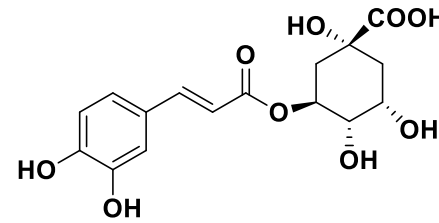

Chlorogenic acid

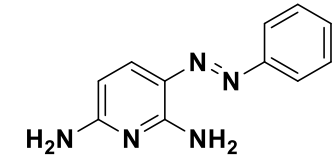

Phenazopyridine

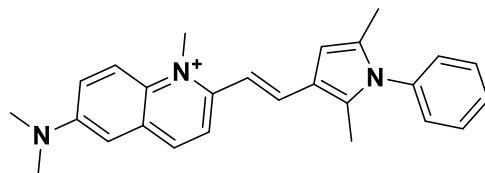

Pyrvinium

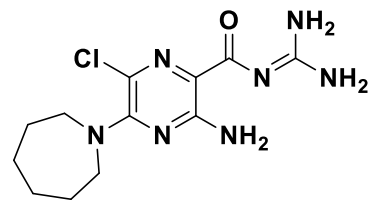

5-(N,N-Hexamethylene)amiloride

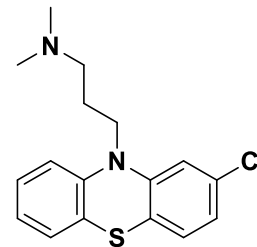

Chlorpromazine

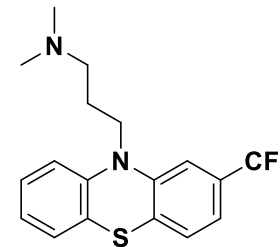

Triflupromazine

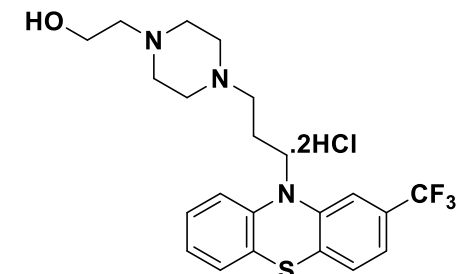

Fluphenazine hydrochloride

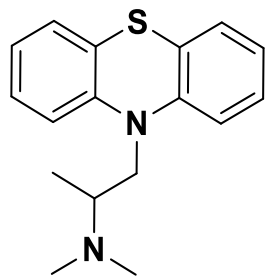

Promethazine

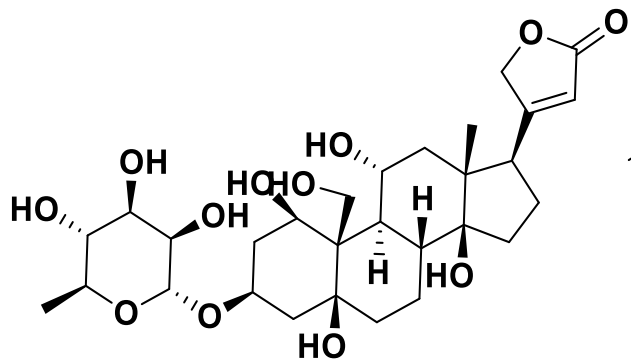

Ouabain

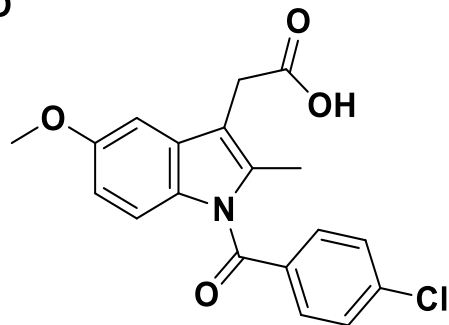

Indometacin

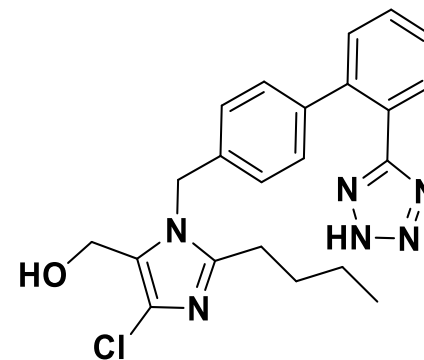

Losartan

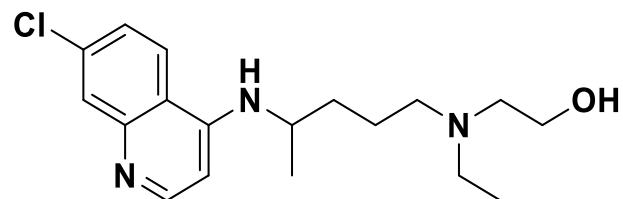

Hydroxychloroquine

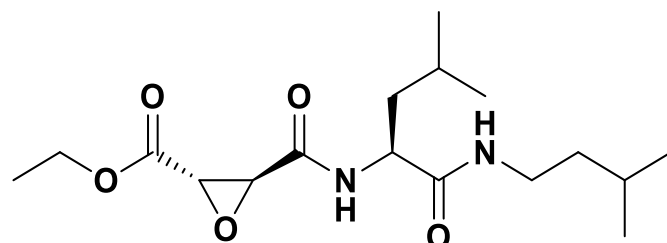

E-64-D

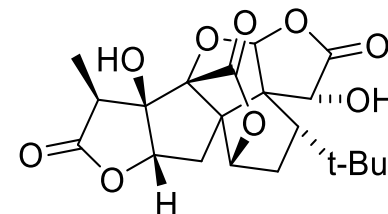

Ginkgolide A

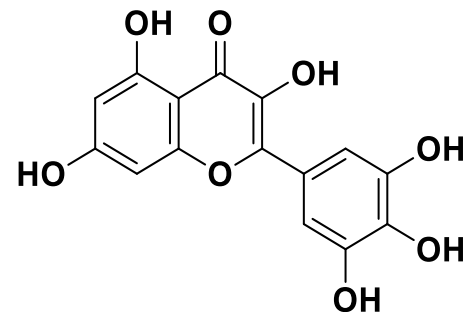

Myricetin

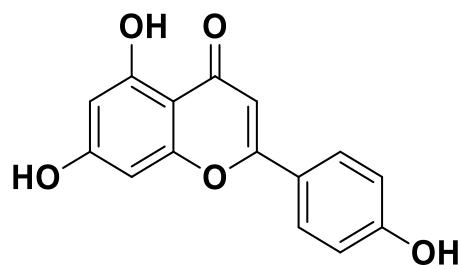

Apigenin

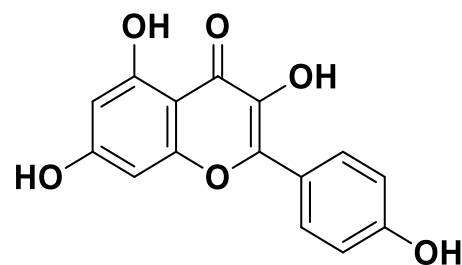

Kaempferol

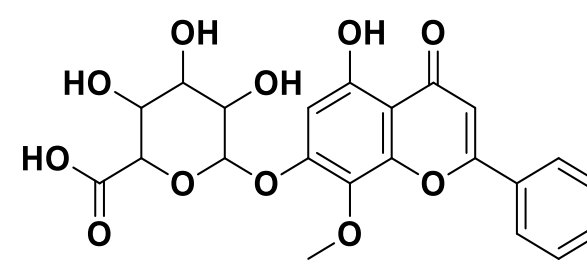

Wogonoside

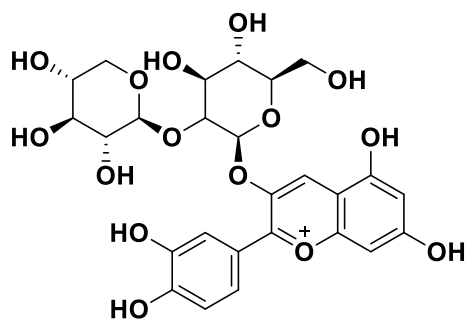

Cyanidin 3-sambubioside

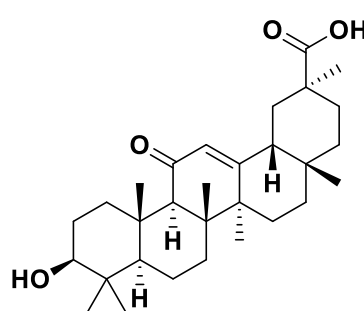

Glycyrrhetic acid

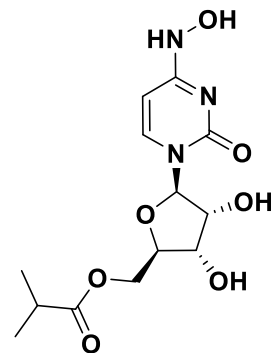

Molnupiravir (EIDD-2801)

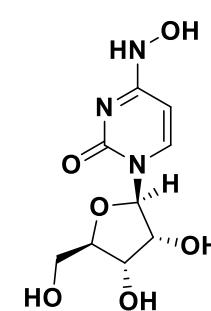

EIDD-1931

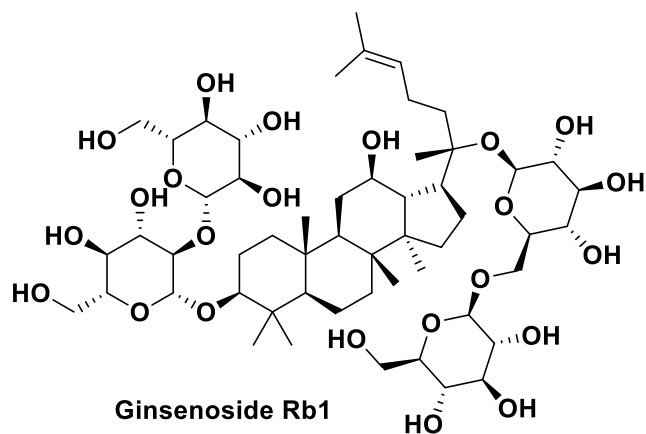

Ginsenoside Rb1

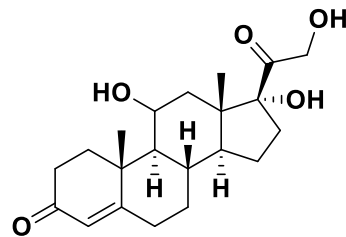

Glucocorticoid

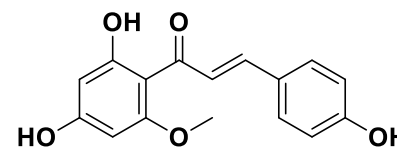

Helichrysetin

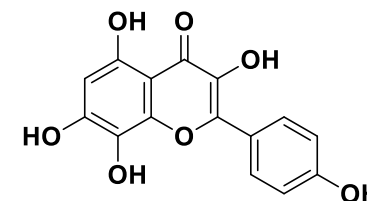

Herbacetin

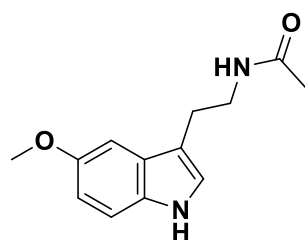

Melatonin

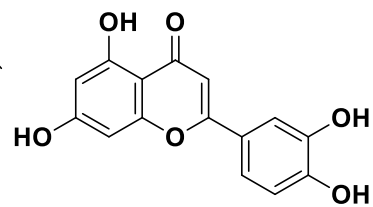

Luteolin

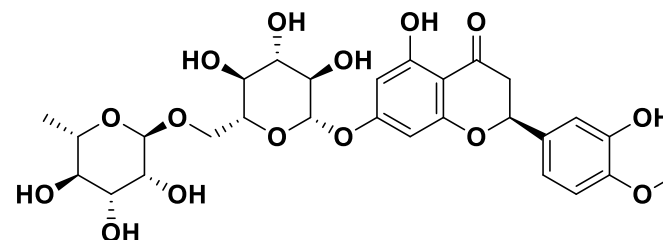

Hesperidin

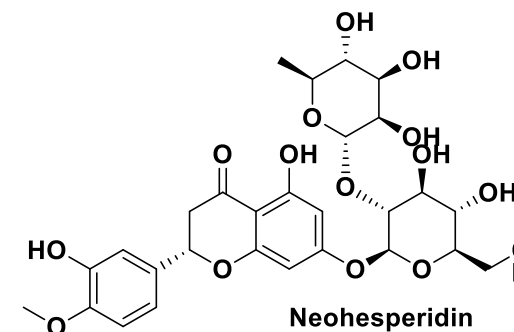

Neohesperidin



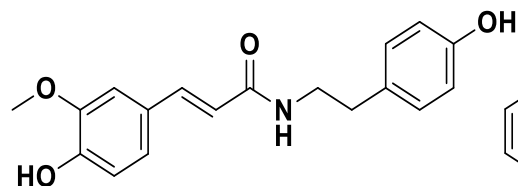

Moupinamide

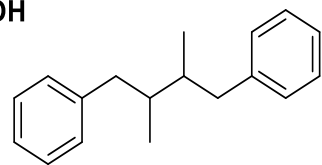

Lignan

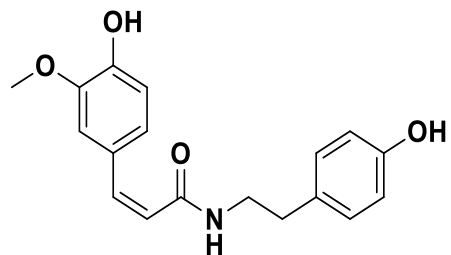

n-cis-Feruloyltyramine

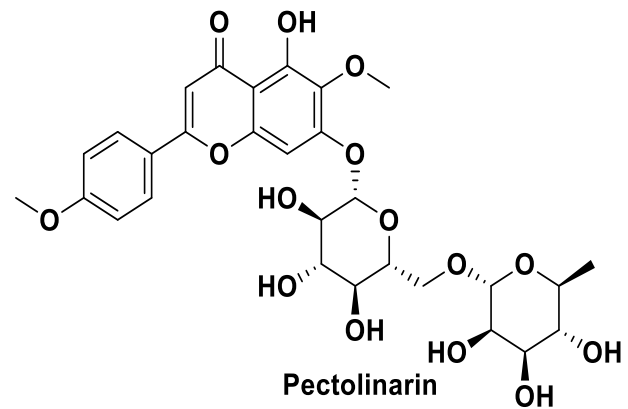

Pectolarin

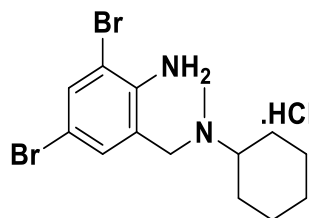

Bromhexine hydrochloride

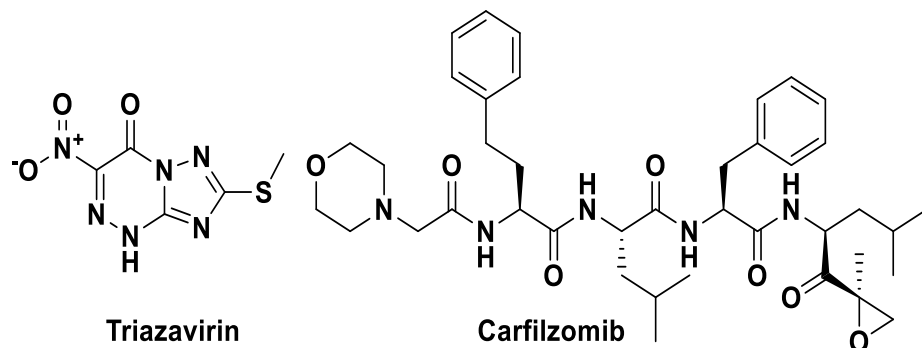

Carfilzomib

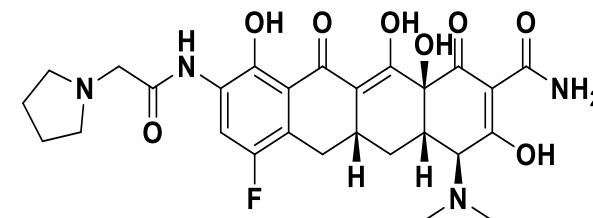

Eravacycline

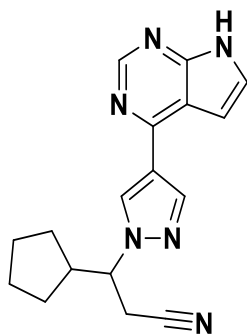

Ruxolitinib

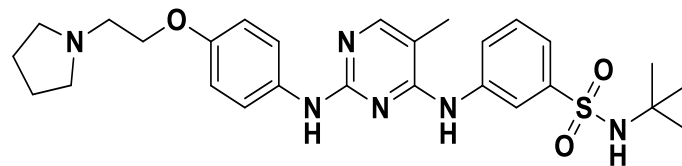

Fedratinib

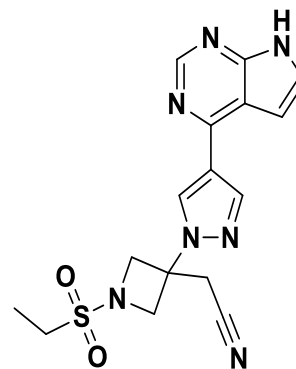

Baricitinib

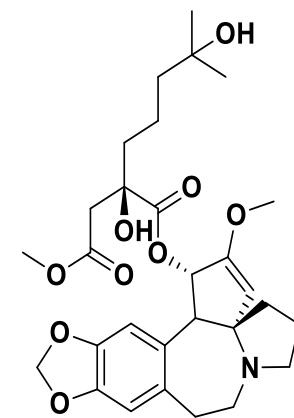

Homoharringtonine

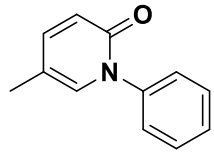

Pirfenidone

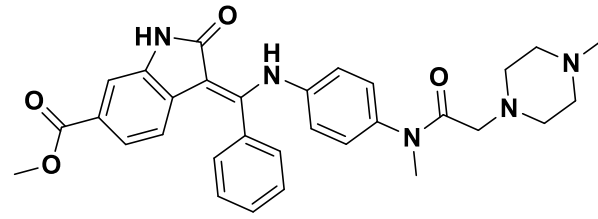

Nintedanib

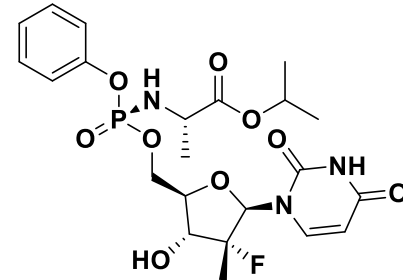

Sofosbuvir

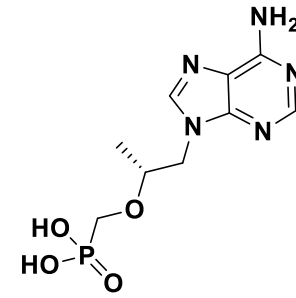

Tenofovir

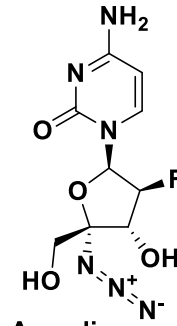

Azvudine

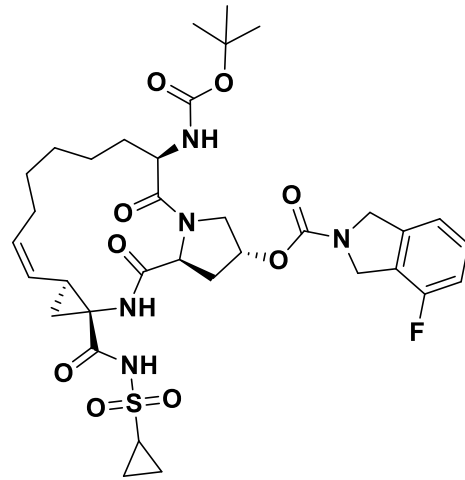

Danoprevir

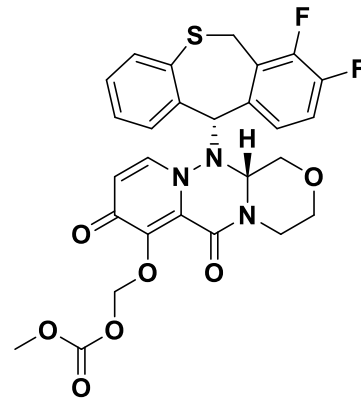

Baloxavir marboxil

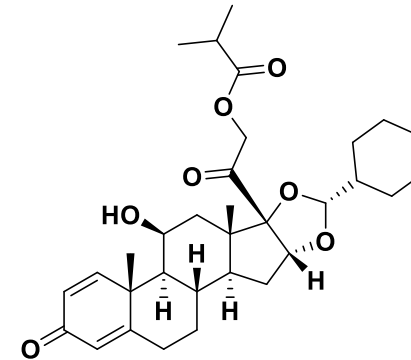

Ciclesonide

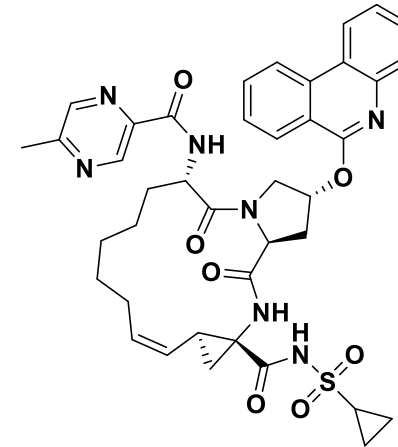

Paritaprevir

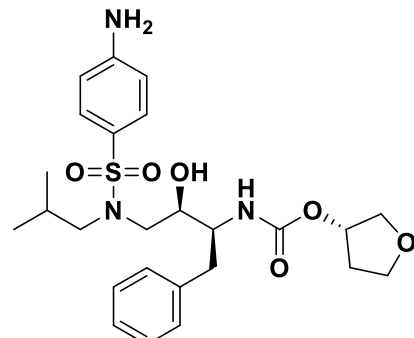

Amprenavir

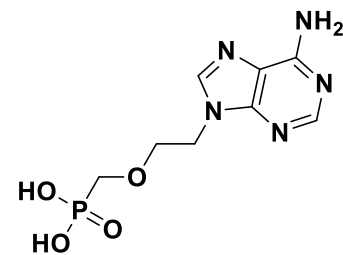

Adefovir

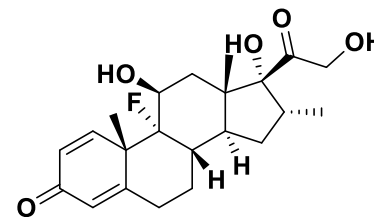

Dexamethasone

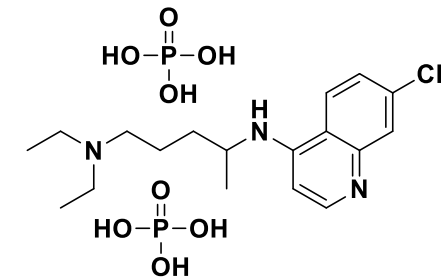

Chloroquine phosphate

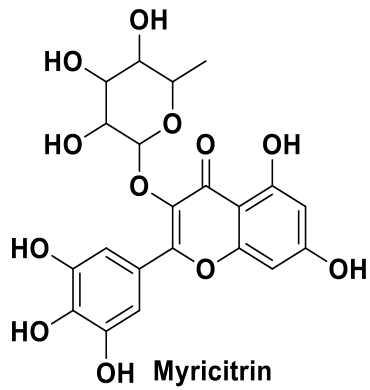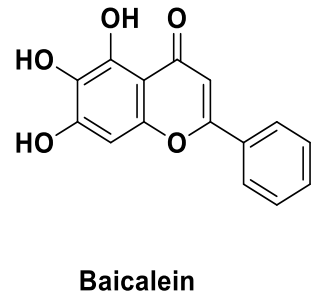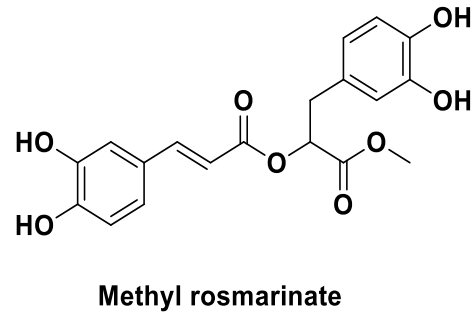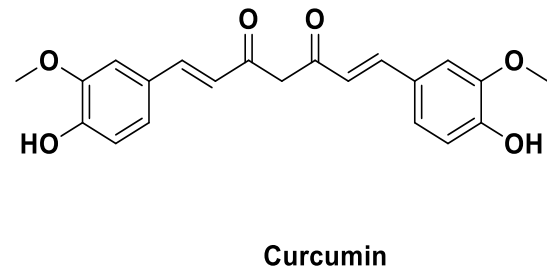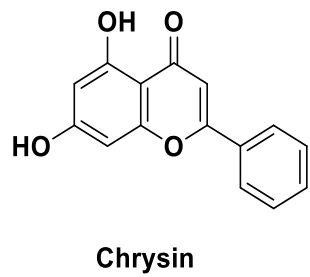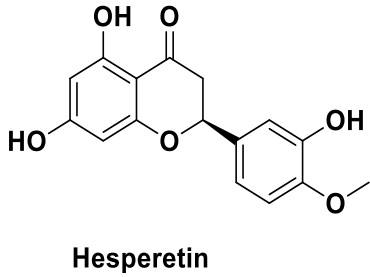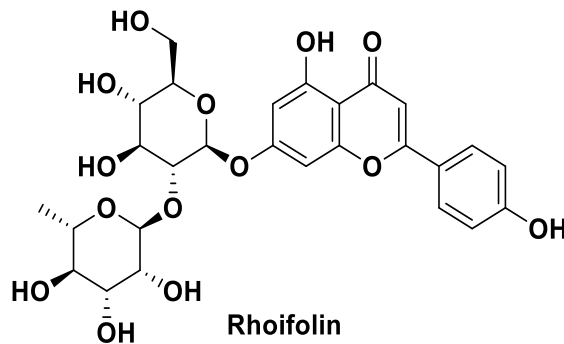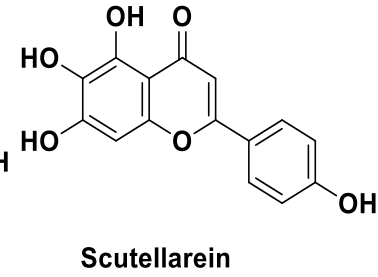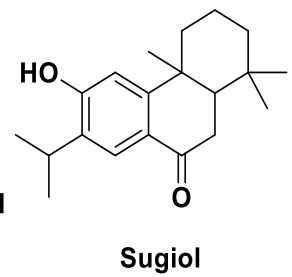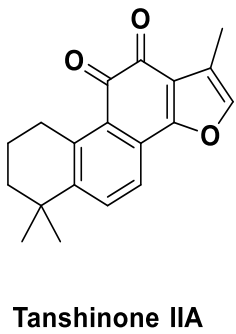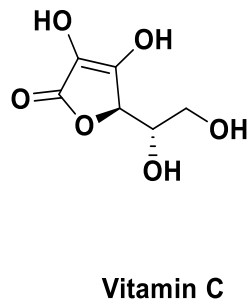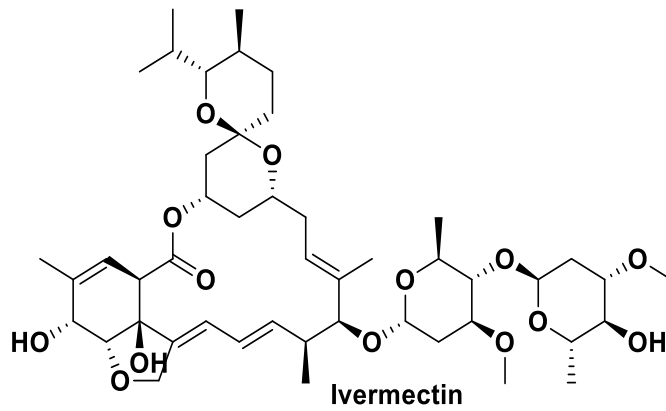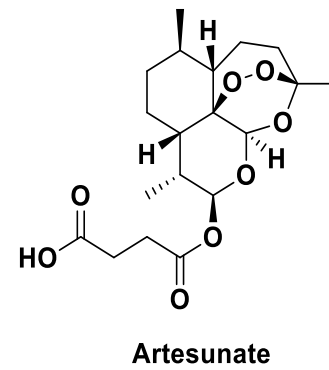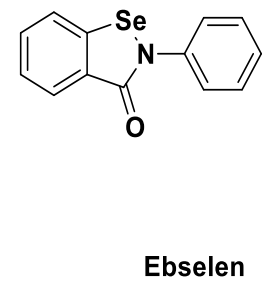

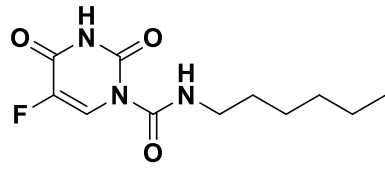

Carmofur

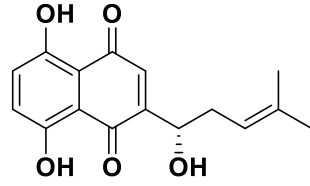

Shikonin

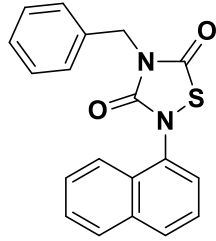

Tideglusib

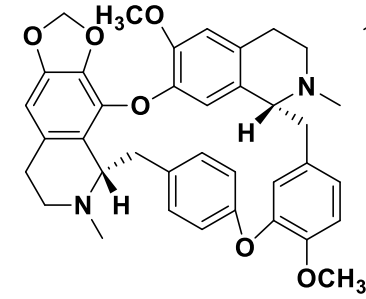

Cepharanthine

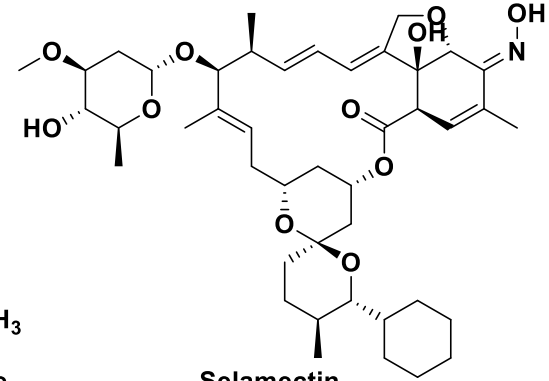

Selamectin

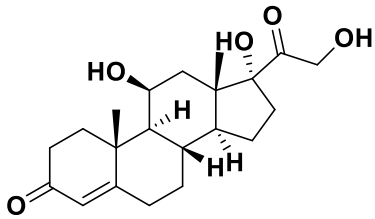

Hydrocortisone

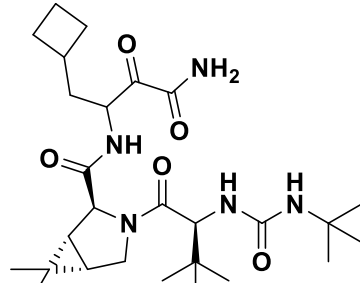

Boceprevir

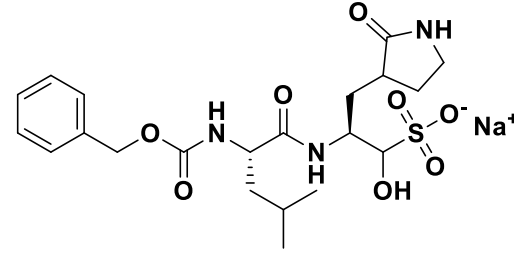

GC 376

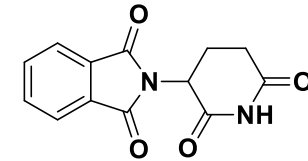

Thalidomide

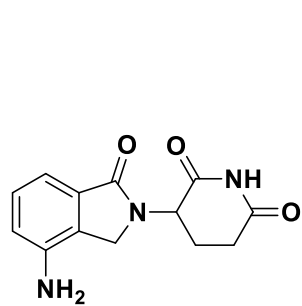

Lenalidomide

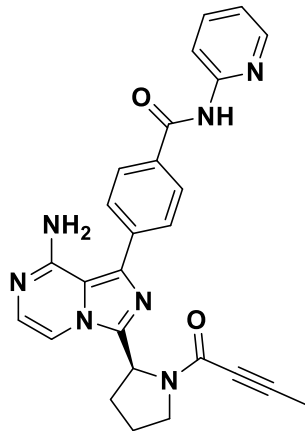

Acalabrutinib

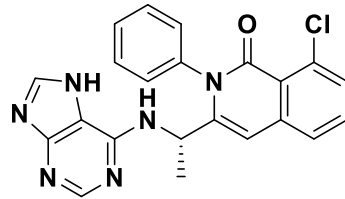

Duvelisib

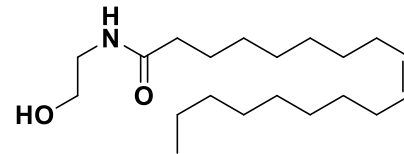

Oleoylethanolamide

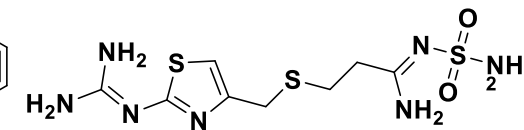

Famotidine

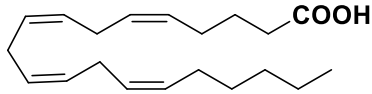

Arachidonic acid

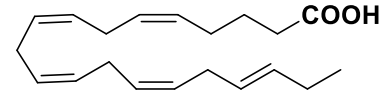

Eicosapentaenoic acid

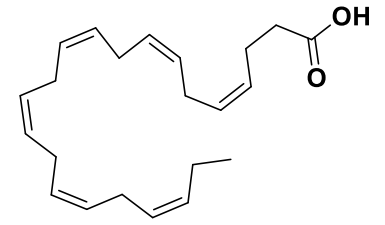

Docosahexaenoic acid

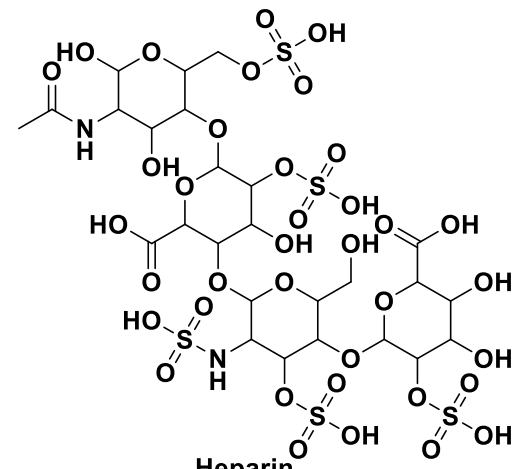

Heparin

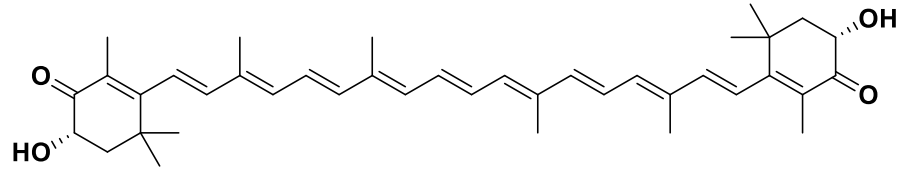

Astaxanthin

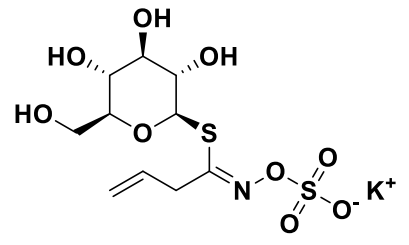

Sinigrin

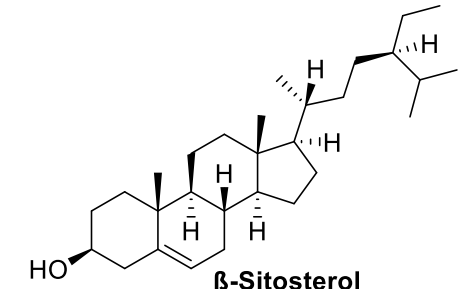

$\beta$ -Sitosterol

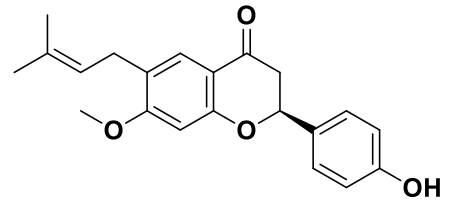

Bavachinin

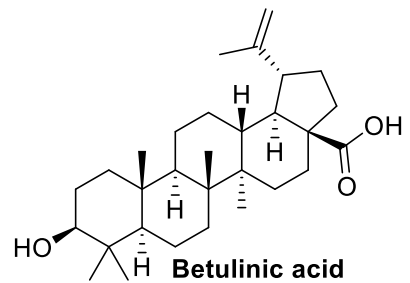

Betulinic acid

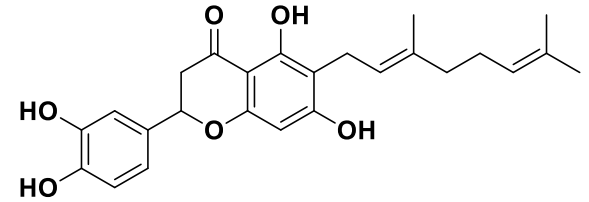

Diplocone

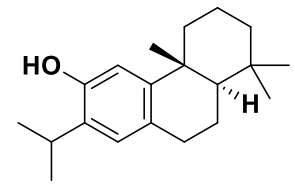

Ferruginol

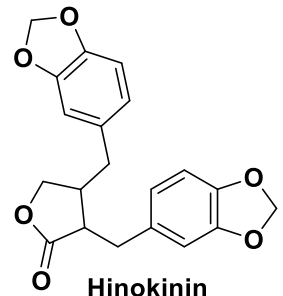

Hinokinin

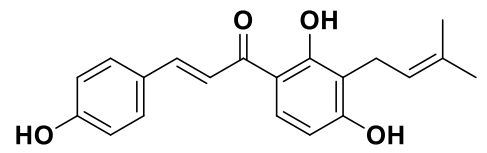

Isobavachalcone

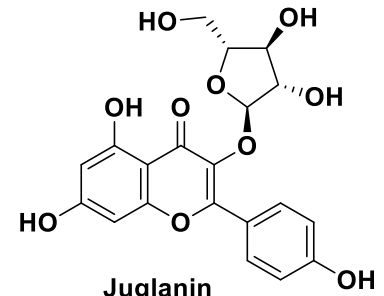

Juglanin

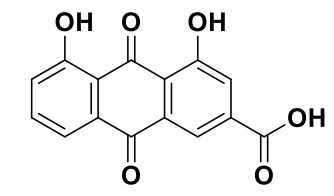

Rhein

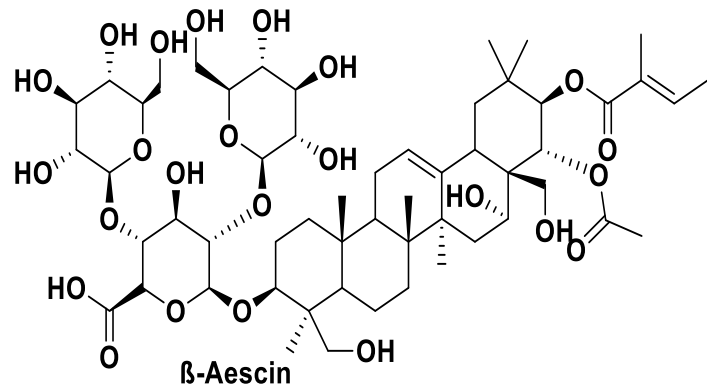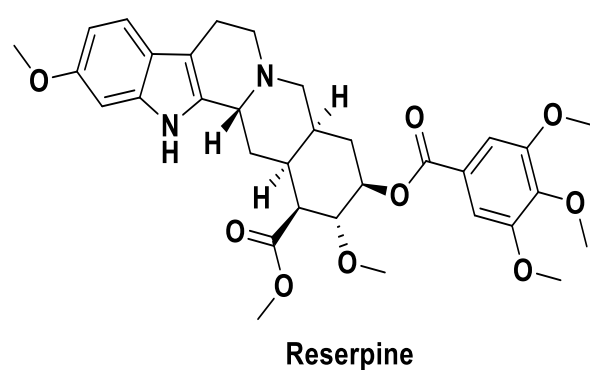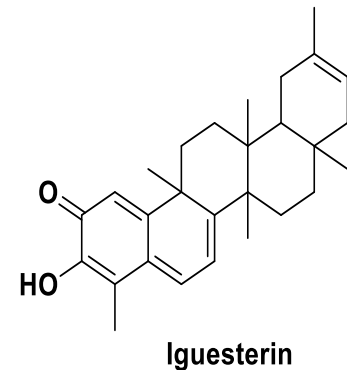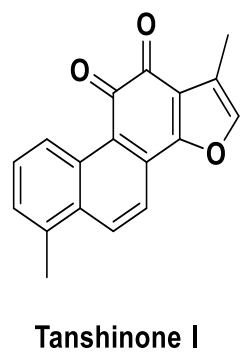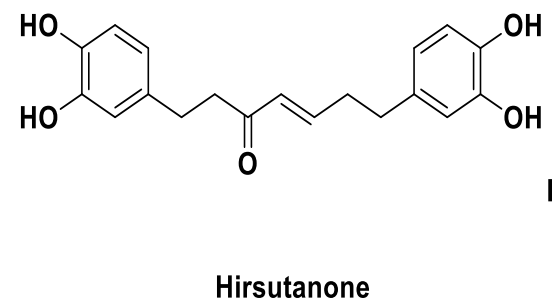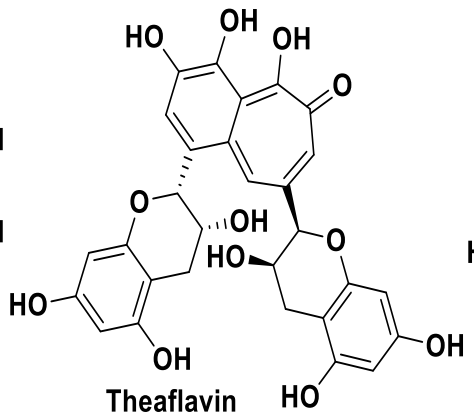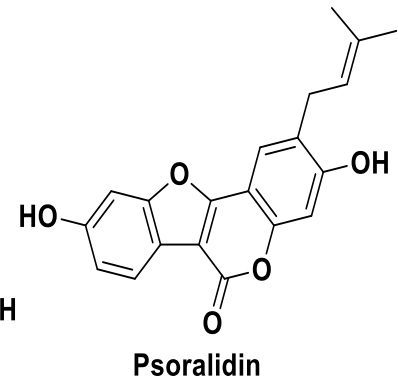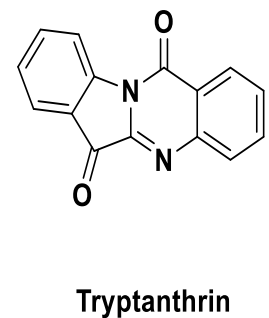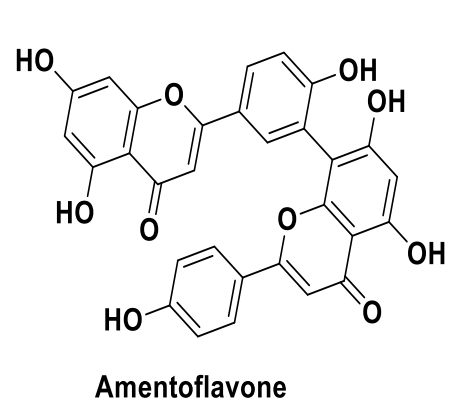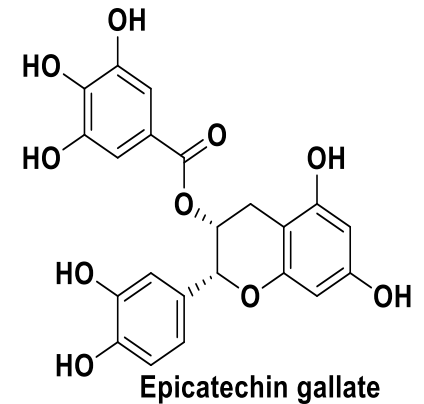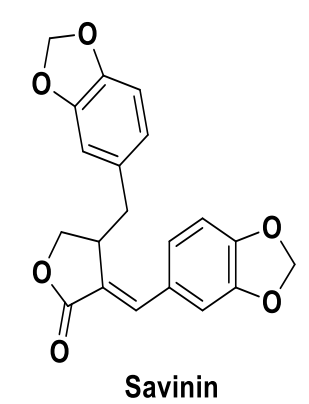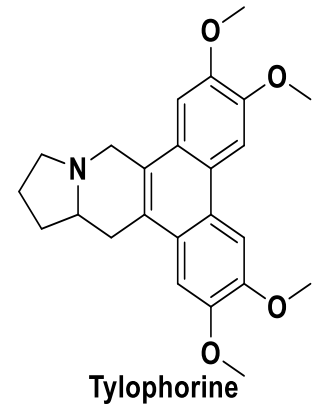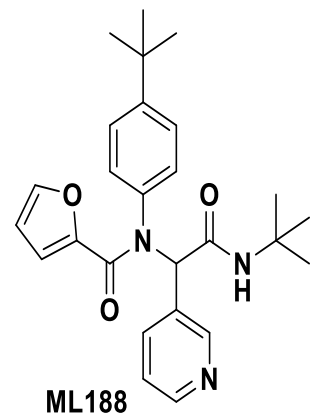

Supplement: mmc1.pdf [file mmc1.pdf]
